# Supplementary material for: Ag@TiO2NPs/PU composite fabric with special wettability for separating various water–oil emulsions
Source: Royal Society of Chemistry journal article supplement (doi:10.1039/d0ra06248k), 2020-01-01
Supplement: d0ra06248k1.pdf [file d0ra06248k1.pdf]

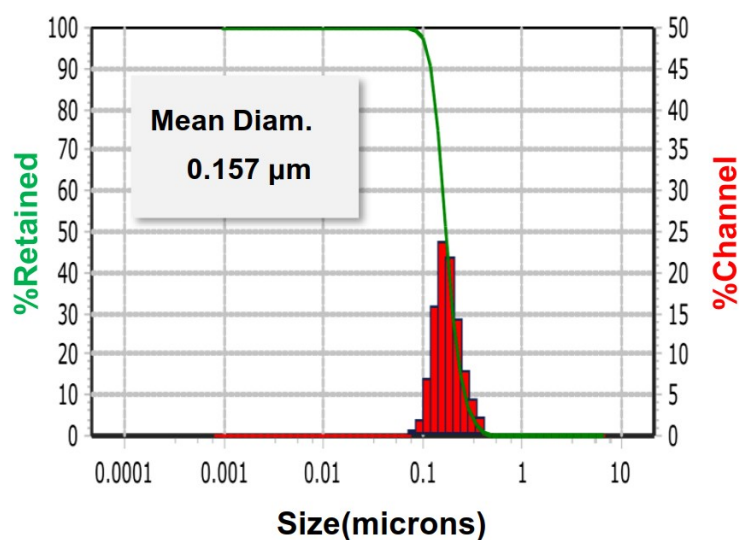

Figure S1. Size distribution of TiO<sub>2</sub> NPs by a particle size analyzer (Microtrac, Wave II) in deionized water.

Table S1. Wetting property of S1-3 and S2-3 after repeated rinsing by water or oil, chemical stability test in acid and base, abrasion with original cotton fabric or sand paper.

| Sample Name |         | Wetting Property    |                   |                |       |                       |                          |
|-------------|---------|---------------------|-------------------|----------------|-------|-----------------------|--------------------------|
|             |         | Rinsing Test        |                   | Immersing Test |       | Abrasion Test         |                          |
|             |         | Water <sub>60</sub> | Oil <sub>60</sub> | pH=1           | pH=13 | Fabric <sub>300</sub> | Sand paper <sub>30</sub> |
| S1-3        | OCA (°) | 158.5               | 159.5             | 157.5          | 158   | 154.5                 | 149                      |
|             | OSA (°) | 7.5                 | 6                 | 8.5            | 7.5   | 10                    | 13.5                     |
| S2-3        | WCA (°) | 156.5               | 155               | 152.5          | 153   | 149                   | 147                      |
|             | WSA (°) | 8                   | 9.5               | 10             | 9     | 13                    | 16.5                     |
